# Supplementary material for: Evaluation of a novel non-invasive preimplantation genetic screening approach
Source: PubMed Central journal article supplement (PMC5944986; doi:10.1371/journal.pone.0197262), 2018-05-10
Supplement: pone.0197262.s002.pdf [file pone.0197262.s002.pdf]

**Supplement Table 1. Results from optimization process evaluating WGA efficacy and downstream application in NGS analysis using Veriseq Kit of a combination of blastocyst conditioned culture medium (BCCM) and/or blastocoel fluid (BF).** Several different approaches in collection of the samples were applied including: with/without d4 zona breaching (ZB), collection of the BF fluid with ICSI pipette together with BCCM.

| Patient number | Sample type | WGA (SurePlex)-DNA concentration (ng/ $\mu$ l) | NGS results         |
|----------------|-------------|------------------------------------------------|---------------------|
| 1              | BCCM+BF     | 14.8                                           | Clinical grade QC   |
| 2              | BCCM+BF     | 12.2                                           | Clinical grade QC   |
| 3              | BCCM+BF     | 17.6                                           | Clinical grade QC   |
| 4              | BCCM+BF     | 5.1                                            | No result           |
| 5              | BCCM+BF     | 11.8                                           | Clinical grade QC   |
| 6              | BCCM+BF     | 11.8                                           | Interpretable/noisy |
| 7              | BCCM+BF     | 16.6                                           | Clinical grade QC   |
| 8              | BCCM+BF     | 14.0                                           | Clinical grade QC   |
| 9              | BCCM+BF     | 22.9                                           | Clinical grade QC   |
| 10             | BCCM+BF     | 11.9                                           | Interpretable/noisy |
| 11             | BCCM+BF     | 13.8                                           | Clinical grade QC   |
| 12             | BCCM+BF     | 14.4                                           | Clinical grade QC   |
| 13             | BCCM+BF     | 8.4                                            | Interpretable/noisy |
| 14             | BCCM+BF     | 7.9                                            | Interpretable/noisy |
| 15             | BCCM        | 12.2                                           | No result           |
| 16             | BCCM        | 11.6                                           | No result           |
| 17             | BCCM        | 16.8                                           | Interpretable/noisy |
| 18             | BCCM        | 12.4                                           | Interpretable/noisy |
| 19             | BCCM        | 9.92                                           | No result           |
| 20             | BCCM        | 15.3                                           | Interpretable/noisy |
| 21             | BCCM        | 7.2                                            | No result           |
| 22             | BCCM        | 22.6                                           | Interpretable/noisy |
| 23             | BCCM        | 9.9                                            | No result           |
